# Supplementary material
Source: PubMed Central journal article supplement (PMC4105844)
Supplement: NIHMS596066-supplement-Suppl_Fig.pdf [file NIHMS596066-supplement-Suppl_Fig.pdf]

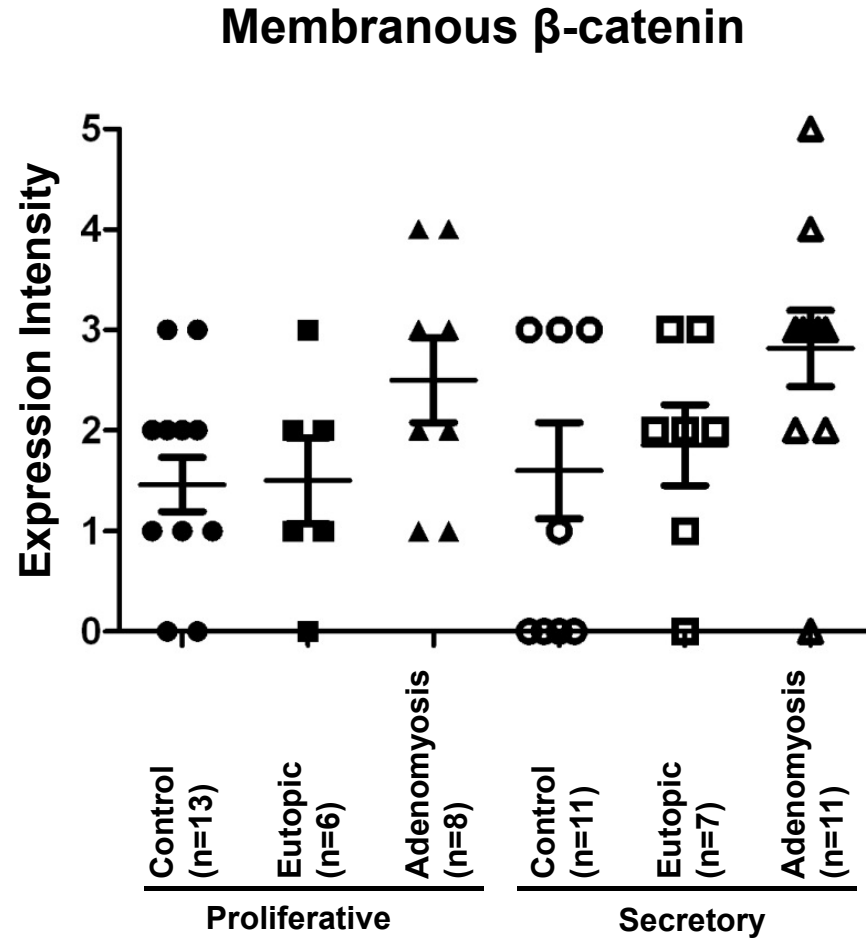

**Supplemental Figure 1.** The expression of membranous  $\beta$ -catenin in endometrial tissue from women with and without adenomyosis. Immunohistochemistry was performed in endometrium of control women (n = 24), and eutopic endometrium (n = 13) and adenomyosis lesion (n = 19). In membrane of epithelial cells, the intensity of  $\beta$ -catenin expression was not changed between controls, eutopic and adenomyosis lesions at different menstrual phases.

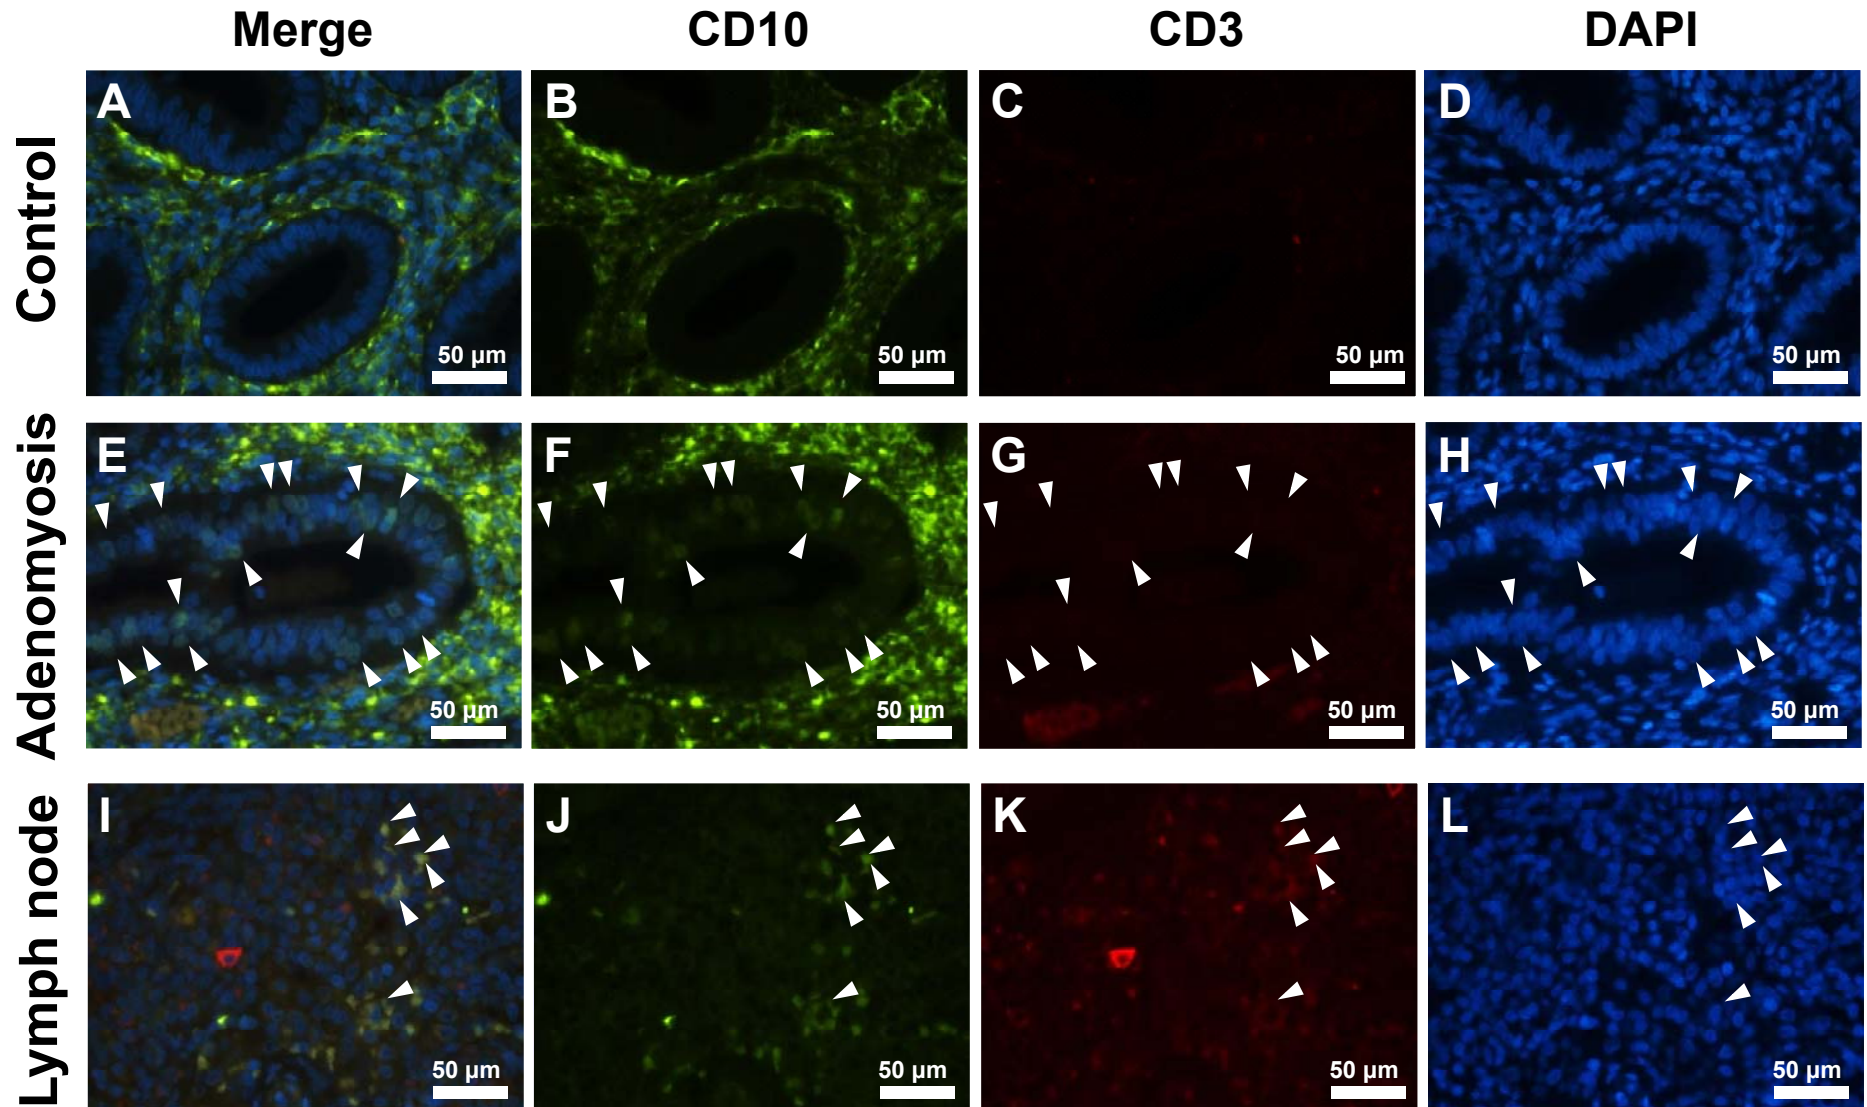

**Supplemental Figure 2.** The expression of CD10 and CD3 in human endometrium with and without adenomyosis. Immunofluorescence analysis of CD10 (B, F and J) and CD3 (C, G and K) was performed with control endometrium (A, B, C and D), eutopic endometrium of adenomyosis (E, F, G and H) and baboon lymph node (I, J, K, and L). Merged images (A, E and I) and DAPI images (D, H, and L). Arrowheads indicate positive-CD10 cells.

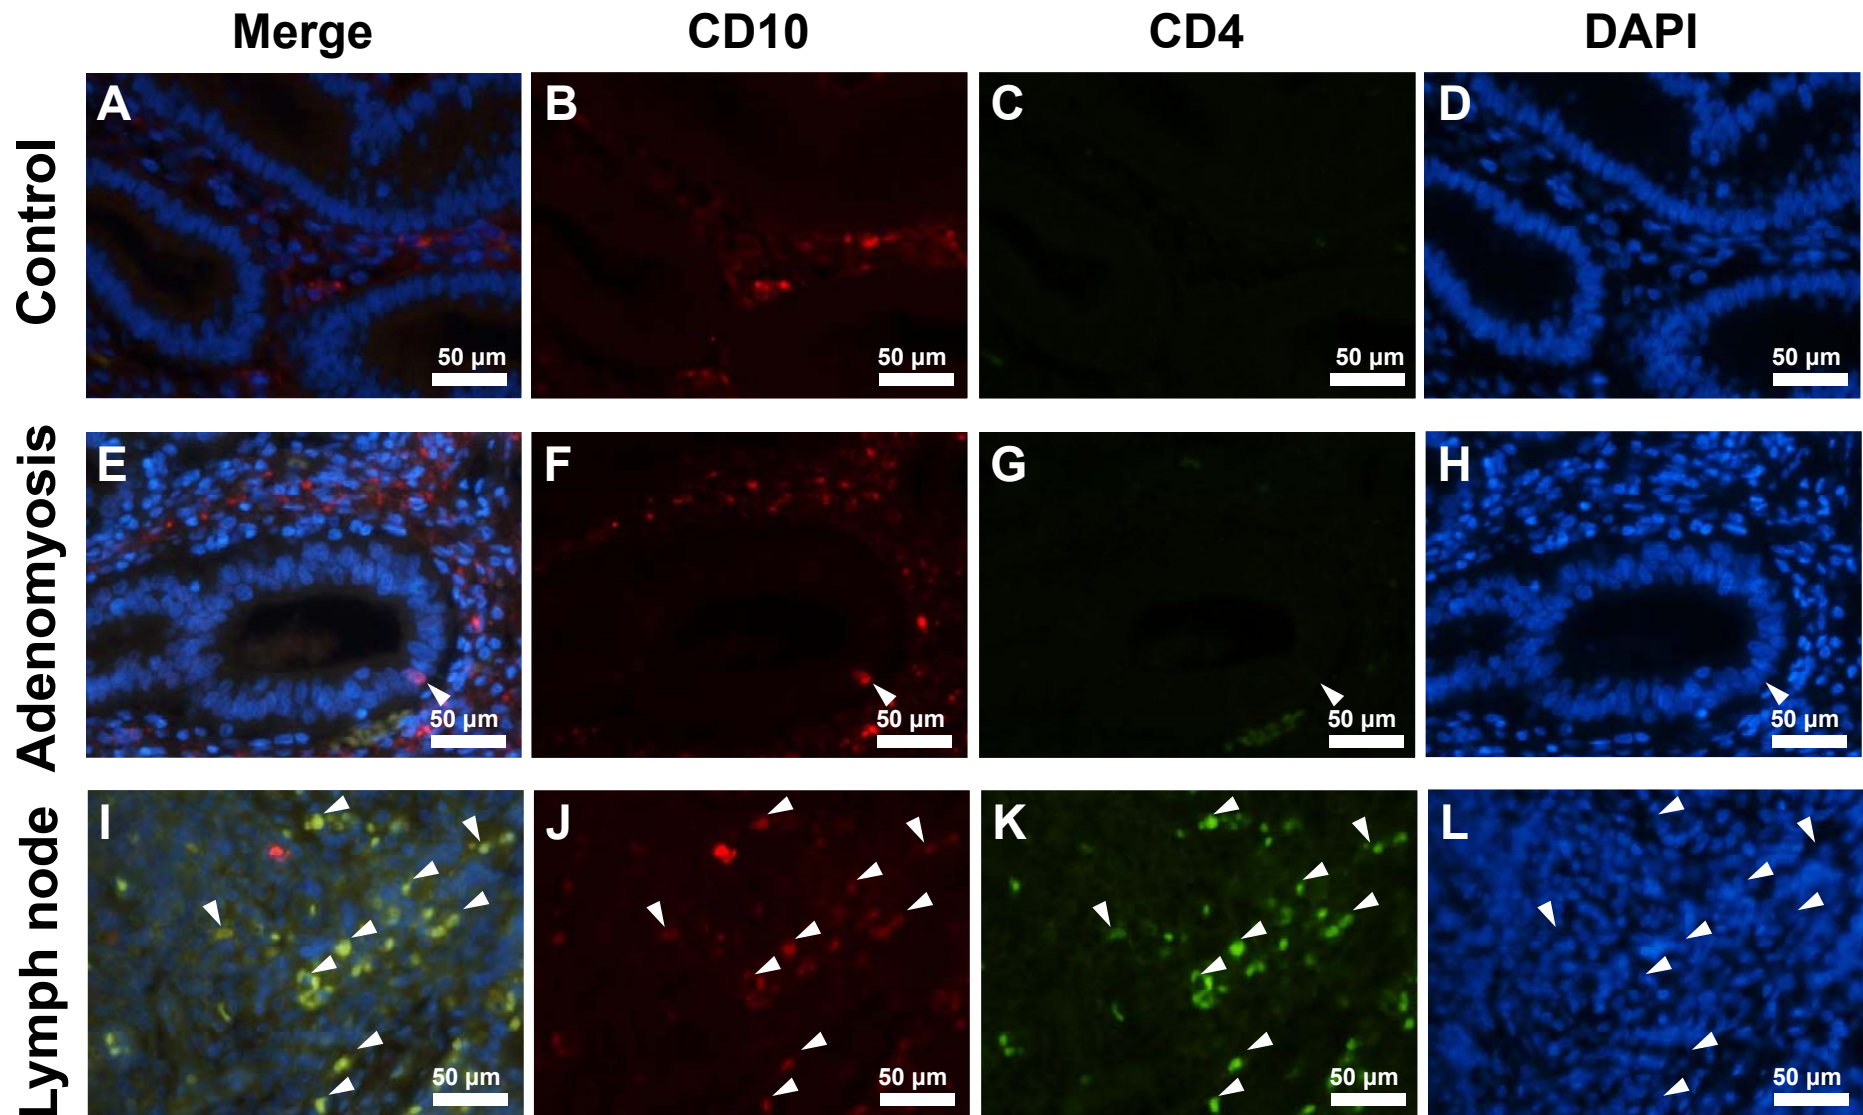

**Supplemental Figure 3.** The expression of CD10 and CD4 in human endometrium with and without adenomyosis. Immunofluorescence analysis of CD10 (B, F and J) and CD4 (C, G and K) was performed with control endometrium (A, B, C and D), eutopic endometrium of adenomyosis (E, F, G and H) and baboon lymph node (I, J, K, and L). Merged images (A, E and I) and DAPI images (D, H, and L). Arrowheads indicate positive-CD10 cells.

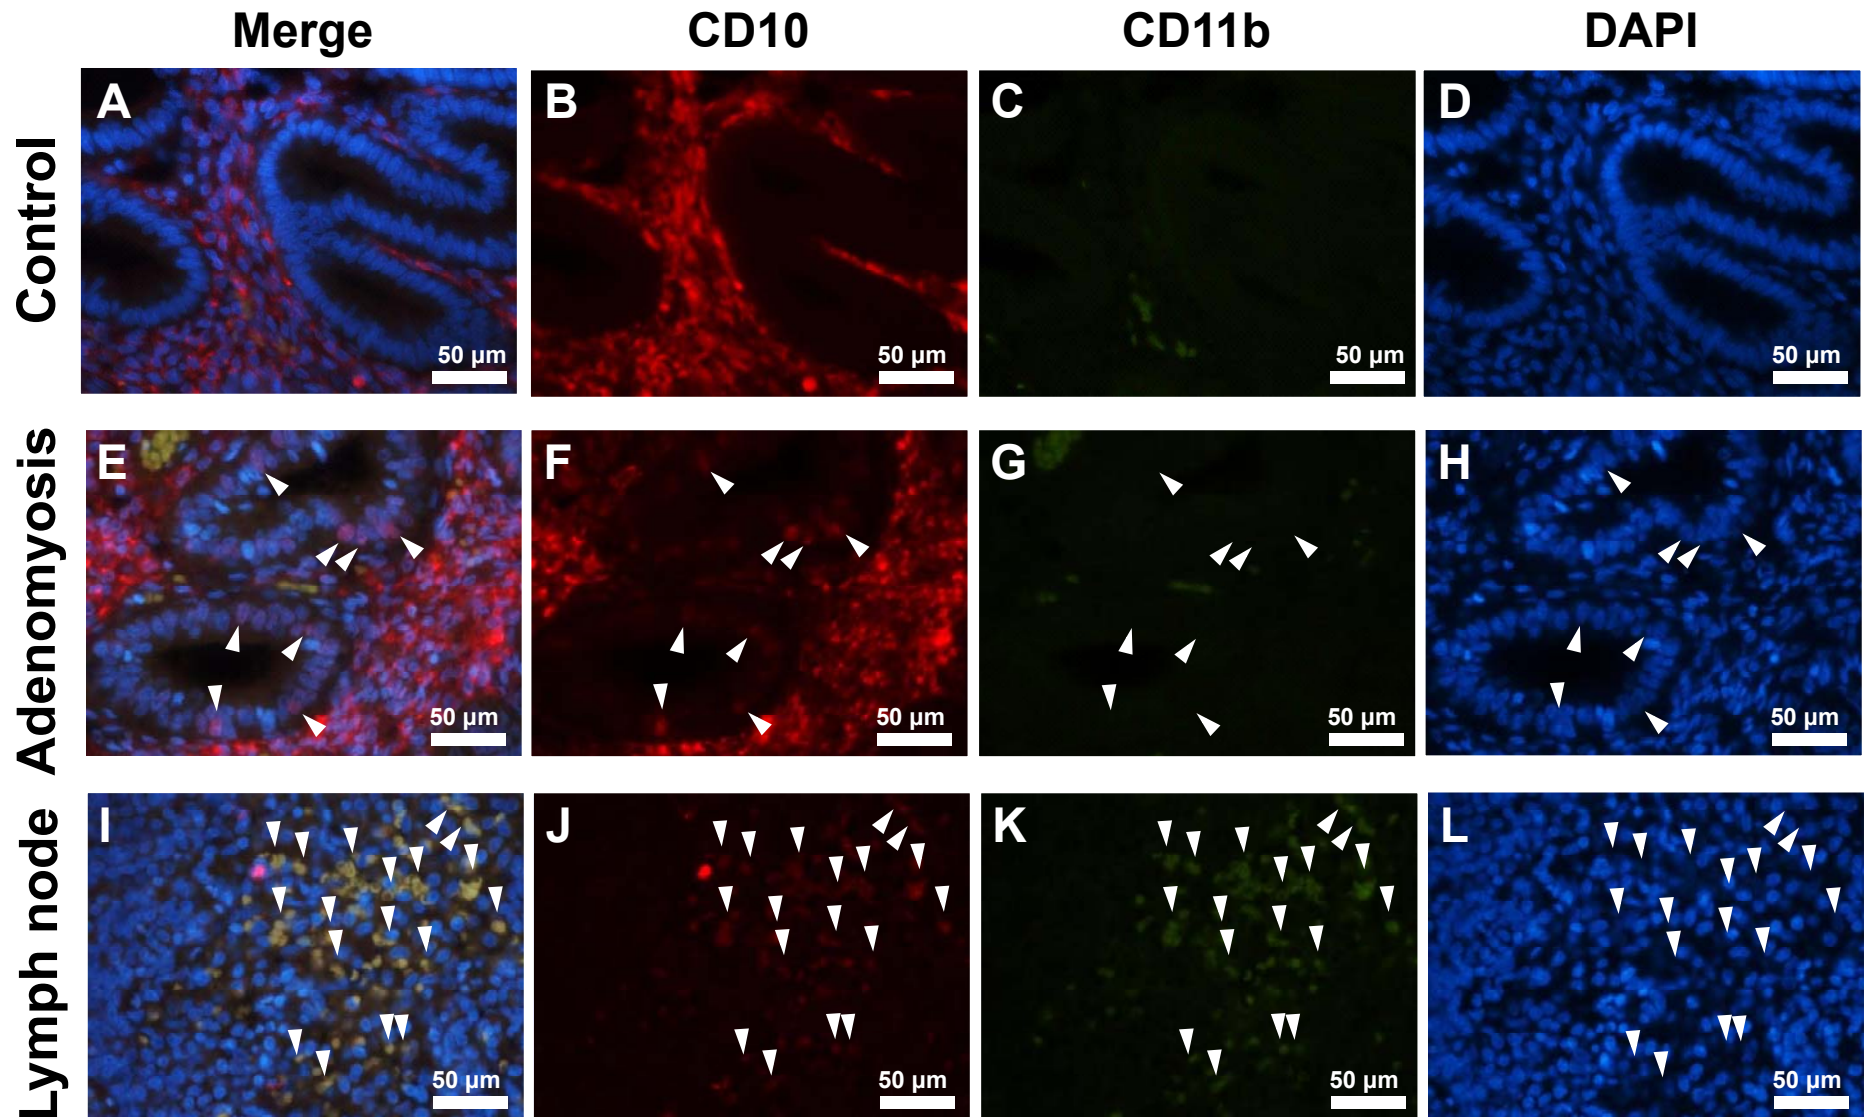

**Supplemental Figure 4.** The expression of CD10 and CD11b in human endometrium with and without adenomyosis.

Immunofluorescence analysis of CD10 (B, F and J) and CD11b (C, G and K) was performed with control endometrium (A, B, C and D), eutopic endometrium of adenomyosis (E, F, G and H) and baboon lymph node (I, J, K, and L). Merged images (A, E and I) and DAPI images (D, H, and L). Arrowheads indicate positive-CD10 cells.
